# Supplementary material
Source: publisher site journal article supplement (https://www.dovepress.com/article/303715)
Supplement: Supplementary file 1 [file get_supplementary_file.php]

**Table S1.** Multivariate analysis of risk factors for thyroid carcinoma.

| Characteristics | OR | 95%CI | *P* |
| --- | --- | --- | --- |
| Age (<54.5 vs. ≥54.5 years) | 0.221 | 0.115-0.428 | <0.001 |
| Hashimoto’s thyroiditis | 2.199 | 1.040-4.647 | 0.039 |
| Diameter of maximal nodules (cm, US) (<3.59 vs. ≥3.59) | 0.461 | 0.259-0.819 | 0.008 |
| Composition of maximal nodules (mixed cystic and solid vs. cystic) | 0.789 | 0.207-3.001 | 0.728 |
| (solid vs. cystic) | 2.464 | 0.686-8.845 | 0.167 |
| Punctuate echogenic foci | 3.249 | 1.796-5.875 | <0.001 |

OR: odds ratio; CI: confidence interval.
